# Supplementary material for: Dietary sodium restriction alters muscle lipidomics that relates to insulin resistance in mice
Source: PubMed Central journal article supplement (PMC7949138; doi:10.1016/j.jbc.2021.100344), 2021-01-29
Supplement: mmc1.pdf [file mmc1.pdf]

## Supporting Information

Table 1. Phosphatidylethanolamine (PE) species identified in the gastrocnemius of LDLR KO male mice fed either the normal sodium (NS; n = 7) or the low-sodium diet (LS; n = 7). Part 1.

|                | NS      |         | LS      |         | <i>P</i>     |
|----------------|---------|---------|---------|---------|--------------|
| PE (16:0/18:1) | 0.2660  | ± 0.043 | 0.3312  | ± 0.021 | 0.160        |
| PE (16:0/18:2) | 0.5750  | ± 0.161 | 0.5337  | ± 0.033 | 0.898        |
| PE (16:0/20:3) | 0.1177  | ± 0.030 | 0.0769  | ± 0.004 | 0.443        |
| PE (16:0/22:4) | 0.9157  | ± 0.220 | 0.7426  | ± 0.025 | 0.250        |
| PE (16:0/20:4) | 1.0722  | ± 0.283 | 1.0567  | ± 0.060 | 0.701        |
| PE (16:0/22:6) | 9.9811  | ± 2.000 | 10.5588 | ± 0.412 | 0.371        |
| PE (16:0/22:5) | 1.4665  | ± 0.334 | 1.4272  | ± 0.058 | 0.443        |
| PE (16:1/18:0) | 0.2301  | ± 0.061 | 0.1655  | ± 0.010 | <b>0.021</b> |
| PE (16:1/22:6) | 0.5409  | ± 0.089 | 0.5190  | ± 0.044 | 1.000        |
| PE (17:0/22:6) | 0.3807  | ± 0.076 | 0.3498  | ± 0.038 | 0.798        |
| PE (18:0/18:1) | 0.4524  | ± 0.567 | 0.4462  | ± 0.484 | 0.898        |
| PE (18:0/18:2) | 1.1170  | ± 0.302 | 1.0181  | ± 0.063 | 0.898        |
| PE (18:0/20:3) | 0.1588  | ± 0.040 | 0.1582  | ± 0.012 | 0.898        |
| PE (18:0/22:4) | 0.4470  | ± 0.112 | 0.4340  | ± 0.019 | 0.701        |
| PE (18:0/20:4) | 2.9129  | ± 0.728 | 2.8888  | ± 0.218 | 0.798        |
| PE (18:0/22:6) | 18.6180 | ± 3.420 | 20.3365 | ± 1.290 | 1.000        |
| PE (18:0/22:5) | 3.1309  | ± 0.580 | 3.2288  | ± 0.131 | 0.798        |
| PE (18:1/18:1) | 0.2449  | ± 0.067 | 0.3274  | ± 0.015 | 0.250        |
| PE (18:1/18:2) | 0.3795  | ± 0.132 | 0.3642  | ± 0.027 | 1.000        |
| PE (18:1/24:0) | 0.8638  | ± 0.020 | 0.0755  | ± 0.007 | 0.701        |
| PE (18:1/20:4) | 1.6324  | ± 0.359 | 1.7087  | ± 0.072 | 0.609        |
| PE (18:1/22:6) | 5.6297  | ± 1.250 | 5.5887  | ± 0.281 | 0.798        |
| PE (18:1/22:5) | 0.5764  | ± 0.092 | 0.4502  | ± 0.033 | 0.201        |
| PE (18:2/18:2) | 0.1487  | ± 0.050 | 0.1426  | ± 0.007 | 0.798        |
| PE (18:2/20:4) | 3.3875  | ± 0.554 | 2.8658  | ± 0.407 | 0.898        |
| PE (18:2/22:6) | 2.0812  | ± 0.438 | 1.9399  | ± 0.102 | 1.000        |
| PE (18:2/22:5) | 0.0867  | ± 0.019 | 0.0919  | ± 0.005 | 0.443        |
| PE (19:0/22:6) | 0.1205  | ± 0.020 | 0.1534  | ± 0.010 | 0.443        |
| PE (20:1/22:6) | 0.1607  | ± 0.036 | 0.1731  | ± 0.011 | 1.000        |
| PE (22:4/22:6) | 1.1434  | ± 0.221 | 0.8747  | ± 0.072 | 0.125        |
| PE (20:4/22:6) | 0.19551 | ± 0.026 | 0.1416  | ± 0.010 | 0.201        |
| PE (22:5/22:6) | 0.1532  | ± 0.021 | 0.1475  | ± 0.016 | 0.798        |

**Table 2. Plasmalogen Phosphatidylethanolamine (PE) species identified in the gastrocnemius of LDLR KO male mice fed either the normal sodium (NS; n = 7) or the low-sodium diet (LS; n = 7).**

|                    | NS      |         | LS      |          | P            |
|--------------------|---------|---------|---------|----------|--------------|
| pPE (p16:0/18:1)   | 0.4826  | ± 0.066 | 0.5527  | ± 0.045  | 0.160        |
| pPE (p16:0/22:4)   | 0.3978  | ± 0.077 | 0.3537  | ± 0.013  | 0.523        |
| pPE (p16:0/20:4)   | 0.7108  | ± 0.178 | 0.7169  | ± 0.036  | 0.898        |
| pPE (p16:0/22:6)   | 10.5008 | ± 2.560 | 10.2824 | ± 0.834  | 1.000        |
| pPE (p16:0/22:5)   | 1.5650  | ± 0.377 | 1.6925  | ± 0.113  | 0.609        |
| pPE (p17:0/18:1)   | 0.0903  | ± 0.023 | 0.1083  | ± 0.009  | 0.523        |
| pPE (p18:0/18:1)   | 0.4128  | ± 0.477 | 2.8373  | ± 0.264  | <b>0.011</b> |
| pPE (p18:0/22:4)   | 0.4487  | ± 0.128 | 0.3978  | ± 0.022  | 0.443        |
| pPE (p18:0/20:4)   | 0.6119  | ± 0.142 | 0.5925  | ± 0.0336 | 1.000        |
| pPE (p18:0/22:6)   | 3.5425  | ± 0.830 | 3.8973  | ± 0.223  | 0.443        |
| pPE (p18:0/22:5)   | 0.6468  | ± 0.153 | 0.7967  | ± 0.039  | 0.371        |
| pPE (p18:0:1/16:0) | 0.6299  | ± 0.159 | 0.6005  | ± 0.045  | 0.250        |
| pPE (p18:0:1/18:1) | 3.2096  | ± 0.653 | 3.3515  | ± 0.299  | 0.701        |
| pPE (p18:0:1/18:2) | 0.2228  | ± 0.052 | 0.2395  | ± 0.015  | 0.523        |
| pPE (p18:0:1/20:4) | 0.0473  | ± 0.014 | 0.0559  | ± 0.012  | 0.523        |
| pPE (p18:0:1/22:6) | 2.6674  | ± 0.574 | 2.6973  | ± 0.201  | 1.000        |
| pPE (p18:0:1/22:5) | 0.2652  | ± 0.055 | 0.2857  | ± 0.020  | 0.701        |
| pPE (p18:0:2/18:1) | 0.3060  | ± 0.090 | 0.3371  | ± 0.029  | 0.609        |
| pPE (p18:0:2/22:6) | 0.4162  | ± 0.157 | 0.4589  | ± 0.046  | 1.000        |
| pPE (p20:0/22:6)   | 0.1266  | ± 0.041 | 0.1213  | ± 0.009  | 0.898        |

**Table 3. Phosphatidylglycerine (PG) species identified in the gastrocnemius of LDLR KO male mice fed either the normal sodium (NS; n = 7) or the low-sodium diet (LS; n = 7).**

|                | NS     |         | LS     |          | P     |
|----------------|--------|---------|--------|----------|-------|
| PG (16:0/18:1) | 0,2541 | ± 0.063 | 0,3719 | ± 0.018  | 0.307 |
| PG (16:0/18:2) | 0.0440 | ± 0.012 | 0.0571 | ± 0.002  | 0.609 |
| PG (16:0/20:4) | 0.0156 | ± 0.003 | 0.0159 | ± 0.002  | 0.609 |
| PG (16:1/18:1) | 0.0051 | ± 0.000 | 0.0067 | ± 0.0004 | 0.097 |
| PG (18:0/18:1) | 0.3313 | ± 0.066 | 0.3662 | ± 0.021  | 0.701 |
| PG (18:0/18:2) | 0.2119 | ± 0.057 | 0.2283 | ± 0.081  | 1.000 |
| PG (18:1/18:2) | 0.0499 | ± 0.014 | 0.0401 | ± 0.004  | 0.898 |

**Table 4. Sphingomyelin (SM) species identified in the gastrocnemius of LDLR KO male mice fed either the normal sodium (NS; n = 7) or the low-sodium diet (LSD; n = 7).**

|                 | NS     |         | LS     |         | P     |
|-----------------|--------|---------|--------|---------|-------|
| SM (d18:0/16:0) | 0.0349 | ± 0.003 | 0.0325 | ± 0.004 | 0.701 |
| SM (d18:1/16:0) | 0.3646 | ± 0.047 | 0.3721 | ± 0.044 | 0.443 |
| SM (d18:1/18:0) | 1.5587 | ± 0.190 | 1.7683 | ± 0.136 | 0.443 |
| SM (d18:1/20:0) | 0.2046 | ± 0.035 | 0.2388 | ± 0.026 | 0.701 |
| SM (d18:1/22:0) | 0.5580 | ± 0.115 | 0.6716 | ± 0.062 | 0.798 |
| SM (d18:1/22:1) | 0.0609 | ± 0.010 | 0.0642 | ± 0.007 | 0.523 |
| SM (d18:1/23:0) | 0.1566 | ± 0.021 | 0.1609 | ± 0.017 | 0.609 |
| SM (d18:1/24:0) | 0.6884 | ± 0.132 | 0.7956 | ± 0.087 | 0.701 |
| SM (d18:1/24:1) | 1.3333 | ± 0.265 | 1.3824 | ± 0.161 | 0.898 |
| SM (d18:1/24:2) | 0.1794 | ± 0.034 | 0.1872 | ± 0.027 | 0.701 |

**Table 5. Ceramide (Cer) species identified in the gastrocnemius of LDLR KO male mice fed either the normal sodium (NS; n = 7) or the low-sodium diet (LS; n = 7). Part 1.**

|                                   | NS     |   |        | LS     |   |        | <i>P</i> |
|-----------------------------------|--------|---|--------|--------|---|--------|----------|
| <b>1G-Cer (d18:0/20:1-OH)</b>     | 0.0300 | ± | 0.004  | 0.0325 | ± | 0.003  | 0.523    |
| <b>1G-Cer (d18:0/22:0-OH)</b>     | 0.0303 | ± | 0.0004 | 0.0334 | ± | 0.0002 | 0.307    |
| <b>1G-Cer (d18:0/22:1-OH)</b>     | 0.1615 | ± | 0.027  | 0.1579 | ± | 0.022  | 0.701    |
| <b>1G-Cer (d18:0/23:1-OH)</b>     | 0.0112 | ± | 0.001  | 0.0097 | ± | 0.001  | 0.798    |
| <b>1G-Cer (d18:0/24:0-OH)</b>     | 0.0111 | ± | 0.001  | 0.0130 | ± | 0.001  | 0.371    |
| <b>1G-Cer (d18:0/24:1-OH)</b>     | 0.2865 | ± | 0.043  | 0.2924 | ± | 0.036  | 0.609    |
| <b>1G-Cer (d18:0/24:2-OH)</b>     | 0.0215 | ± | 0.003  | 0.0195 | ± | 0.002  | 0.609    |
| <b>1G-Cer (d18:1/22:0-OH)</b>     | 0.0014 | ± | 0.0004 | 0.0011 | ± | 0.0002 | 0.307    |
| <b>1G-Cer (d18:1/23:0-OH)</b>     | 0.0031 | ± | 0.0006 | 0.0034 | ± | 0.0005 | 0.609    |
| <b>1G-Cer (d18:0/24:0)</b>        | 0.0105 | ± | 0.002  | 0.0110 | ± | 0.001  | 0.701    |
| <b>1G-Cer (d18:1/20:0)</b>        | 0.0101 | ± | 0.001  | 0.0100 | ± | 0.001  | 0.701    |
| <b>1G-Cer (d18:1/22:0)</b>        | 0.0359 | ± | 0.005  | 0.0328 | ± | 0.005  | 0.523    |
| <b>1G-Cer (d18:1/23:0)</b>        | 0.0145 | ± | 0.002  | 0.0119 | ± | 0.002  | 0.523    |
| <b>1G-Cer (d18:1/24:0)</b>        | 0.2028 | ± | 0.032  | 0.1751 | ± | 0.030  | 0.701    |
| <b>1G-Cer (d18:1/24:1)</b>        | 0.1070 | ± | 0.017  | 0.0970 | ± | 0.016  | 0.523    |
| <b>1G-Cer (d18:1/24:2)</b>        | 0.0103 | ± | 0.0017 | 0.0092 | ± | 0.001  | 0.798    |
| <b>Sulfatide Cer (d18:1/18:0)</b> | 0.0036 | ± | 0.0005 | 0.0038 | ± | 0.0005 | 0.125    |
| <b>Sulfatide Cer (d18:1/20:0)</b> | 0.0021 | ± | 0.0003 | 0.0028 | ± | 0.0005 | 0.097    |
| <b>Sulfatide Cer (d18:1/22:0)</b> | 0.0060 | ± | 0.001  | 0.0060 | ± | 0.0008 | 0.701    |
| <b>Sulfatide Cer (d18:1/23:0)</b> | 0.0019 | ± | 0.0004 | 0.0021 | ± | 0.0002 | 0.443    |

**Table 5. Ceramide (Cer) species identified in the gastrocnemius of LDLR KO male mice fed either the normal sodium (NS; n = 7) or the low-sodium diet (LS; n = 7). Part 2.**

|                                      | NS     |   |        | LS      |   |        | <i>P</i> |
|--------------------------------------|--------|---|--------|---------|---|--------|----------|
| <b>Sulfatide Cer (d18:1/24:0)</b>    | 0.0355 | ± | 0.005  | 0.0311  | ± | 0.005  | 0.701    |
| <b>Sulfatide Cer (d18:1/24:1)</b>    | 0.0361 | ± | 0.007  | 0.0321  | ± | 0.005  | 0.798    |
| <b>Sulfatide Cer (d18:2/24:1)</b>    | 0.0042 | ± | 0.001  | 0.0046  | ± | 0.0008 | 0.307    |
| <b>Sulfatide Cer (d18:1/22:0-OH)</b> | 0.0030 | ± | 0.0008 | 0.0045  | ± | 0.0005 | 0.201    |
| <b>Sulfatide Cer (d18:1/24:0-OH)</b> | 0.0050 | ± | 0.001  | 0.0063  | ± | 0.0006 | 0.250    |
| <b>Cer (d18:1/18:0)</b>              | 0.2088 | ± | 0.040  | 0.2663  | ± | 0.015  | 0.443    |
| <b>Cer (d18:1/22:0)</b>              | 0.0088 | ± | 0.001  | 0.0112  | ± | 0.0007 | 0.250    |
| <b>Cer (d18:1/24:0)</b>              | 0.0093 | ± | 0.002  | 0.0119  | ± | 0.001  | 0.160    |
| <b>Cer (d18:1/24:1)</b>              | 0.0231 | ± | 0.004  | 0.02652 | ± | 0.002  | 0.609    |
| <b>Cer (d18:1/24:2)</b>              | 0.0043 | ± | 0.001  | 0.00499 | ± | 0.0006 | 0.201    |

**Table 6. Diacylglycerol (DG) species identified in the gastrocnemius of LDLR KO male mice fed either the normal sodium (NS; n = 7) or the low-sodium diet (LS; n = 7)**

|                       | NS     |   |       | LS     |   |       | <i>P</i> |
|-----------------------|--------|---|-------|--------|---|-------|----------|
| <b>DG (16:1/18:1)</b> | 2.6338 | ± | 0.339 | 3.6384 | ± | 0.366 | 0.250    |
| <b>DG (18:2/18:2)</b> | 0.9752 | ± | 0.259 | 1.1888 | ± | 0.216 | 0.609    |
| <b>DG (18:1/18:2)</b> | 3.4143 | ± | 0.524 | 4.4584 | ± | 0.490 | 0.371    |
| <b>DG (18:1/18:1)</b> | 1.8148 | ± | 0.223 | 1.9748 | ± | 0.207 | 0.701    |

**Table 7. Triglycerides (TG) species identified in the gastrocnemius of LDLR KO male mice fed either the normal sodium (NS; n = 7) or the low-sodium diet (LS; n = 7). Part 1.**

|                            | NS     |   |       | LS     |   |       | <i>P</i> |
|----------------------------|--------|---|-------|--------|---|-------|----------|
| <b>TG (12:0/16:1/18:2)</b> | 0,0687 | ± | 0.025 | 0,0759 | ± | 0.013 | 1.000    |
| <b>TG (14:0/16:0/16:1)</b> | 0,3146 | ± | 0.220 | 0,3466 | ± | 0.044 | 0.798    |
| <b>TG (14:0/16:0/18:1)</b> | 0,2417 | ± | 0.319 | 0,5257 | ± | 0.122 | 0.898    |
| <b>TG (14:0/16:1/18:1)</b> | 0,3945 | ± | 0.221 | 0,4286 | ± | 0.066 | 0.609    |
| <b>TG (14:0/16:1/16:1)</b> | 0,6152 | ± | 0.264 | 0,7356 | ± | 0.085 | 0.443    |
| <b>TG (14:0/18:1/18:1)</b> | 0,5218 | ± | 0.751 | 1,6342 | ± | 0.382 | 0.898    |
| <b>TG (14:0/18:2/18:2)</b> | 0,6987 | ± | 0.212 | 0,9470 | ± | 0.130 | 0.943    |
| <b>TG (14:1/16:0/16:1)</b> | 0,0147 | ± | 0.031 | 0,0678 | ± | 0.016 | 1.000    |
| <b>TG (14:1/16:1/18:1)</b> | 0,3803 | ± | 0.166 | 0,5099 | ± | 0.060 | 0.371    |
| <b>TG (14:1/16:1/18:2)</b> | 0,5051 | ± | 0.133 | 0,6282 | ± | 0.075 | 0.609    |
| <b>TG (14:1/16:1/16:1)</b> | 0,2456 | ± | 0.079 | 0,2996 | ± | 0.043 | 0.523    |
| <b>TG (14:1/18:2/18:2)</b> | 0,6413 | ± | 0.144 | 0,8332 | ± | 0.105 | 0.307    |
| <b>TG (15:0/16:1/18:1)</b> | 0,0565 | ± | 0.018 | 0,0534 | ± | 0.006 | 0.898    |
| <b>TG (15:0/16:1/18:2)</b> | 0,1142 | ± | 0.041 | 0,1352 | ± | 0.013 | 0.898    |
| <b>TG (15:0/18:1/18:2)</b> | 0,2680 | ± | 0.103 | 0,3604 | ± | 0.043 | 0.701    |
| <b>TG (15:0/18:1/18:1)</b> | 0,0341 | ± | 0.052 | 0,1123 | ± | 0.024 | 0.701    |
| <b>TG (15:0/18:2/18:2)</b> | 0,0312 | ± | 0.006 | 0,0291 | ± | 0.005 | 1.000    |
| <b>TG (16:0/16:1/17:1)</b> | 0,0183 | ± | 0.075 | 0,1935 | ± | 0.022 | 0.701    |
| <b>TG (16:0/16:1/18:1)</b> | 4,3697 | ± | 2.120 | 6,6899 | ± | 0.833 | 0.609    |
| <b>TG (16:0/16:1/22:6)</b> | 0,1552 | ± | 0.046 | 0,2200 | ± | 0.029 | 0.701    |
| <b>TG (16:0/16:1/16:1)</b> | 1,6426 | ± | 0.748 | 2,2424 | ± | 0.247 | 0.523    |
| <b>TG (16:0/17:1/18:1)</b> | 0,2712 | ± | 0.113 | 0,3871 | ± | 0.044 | 0.701    |
| <b>TG (16:0/17:1/18:2)</b> | 0,1310 | ± | 0.033 | 0,1176 | ± | 0.013 | 0.898    |
| <b>TG (16:0/18:0/18:1)</b> | 0,4230 | ± | 0.390 | 0,5933 | ± | 0.082 | 0.898    |
| <b>TG (16:0/18:0/18:2)</b> | 0,7326 | ± | 1.010 | 2,1276 | ± | 0.531 | 0.701    |
| <b>TG (16:0/18:1/18:2)</b> | 6,1253 | ± | 2.700 | 9,2644 | ± | 1.170 | 0.609    |
| <b>TG (16:0/18:1/19:1)</b> | 0,0517 | ± | 0.060 | 0,1091 | ± | 0.022 | 0.701    |

**Table 7. Triglycerides (TG) species identified in the gastrocnemius of LDLR KO male mice fed either the normal sodium (NS; n = 7) or the low-sodium diet (LS; n = 7). Part 2.**

|                     | NS     |   |       | LS      |   |       | <i>P</i> |
|---------------------|--------|---|-------|---------|---|-------|----------|
| TG (16:0/18:1/20:1) | 0.4536 | ± | 0.460 | 0.8374  | ± | 0.238 | 0.798    |
| TG (16:0/18:1/22:6) | 0.1398 | ± | 0.046 | 0.211   | ± | 0.031 | 0.443    |
| TG (16:0/18:1/18:1) | 5.3333 | ± | 1.730 | 7.4239  | ± | 0.926 | 1.000    |
| TG (16:0/18:2/22:4) | 0.0415 | ± | 0.040 | 0.0929  | ± | 0.025 | 0.609    |
| TG (16:0/18:2/22:6) | 0.1733 | ± | 0.040 | 0.2911  | ± | 0.025 | 0.371    |
| TG (16:0/18:2/18:2) | 0.3569 | ± | 0.474 | 1.0290  | ± | 0.303 | 0.701    |
| TG (16:0/16:0/16:1) | 1.0012 | ± | 0.756 | 1.1728  | ± | 0.171 | 0.798    |
| TG (16:0/16:0/18:1) | 2.0052 | ± | 1.670 | 2.9952  | ± | 0.400 | 1.000    |
| TG (16:0/16:0/16:0) | 0.1914 | ± | 0.107 | 0.3591  | ± | 0.048 | 0.371    |
| TG (16:1/17:1/18:2) | 0.2188 | ± | 0.070 | 0.3100  | ± | 0.033 | 0.898    |
| TG (16:1/18:1/18:2) | 8.6219 | ± | 2.700 | 12.0870 | ± | 1.170 | 0.609    |
| TG (16:1/18:1/18:1) | 2.7634 | ± | 0.778 | 3.0303  | ± | 0.393 | 0.609    |
| TG (16:1/18:2/18:3) | 0.6249 | ± | 0.173 | 0.9371  | ± | 0.139 | 0.307    |
| TG (16:1/18:2/22:5) | 0.0119 | ± | 0.010 | 0.0350  | ± | 0.010 | 0.443    |
| TG (16:1/18:2/18:2) | 5.9665 | ± | 1270  | 6.6006  | ± | 0.853 | 0.523    |
| TG (16:1/16:1/17:1) | 0.0622 | ± | 0.017 | 0.0853  | ± | 0.011 | 0.798    |
| TG (16:1/16:1/18:1) | 6.8728 | ± | 1.830 | 8.5875  | ± | 0.829 | 0.701    |
| TG (16:1/16:1/18:2) | 4.1106 | ± | 0.840 | 4.6548  | ± | 0.515 | 0.609    |
| TG (16:1/16:1/18:3) | 0.1380 | ± | 0.036 | 0.1578  | ± | 0.029 | 0.609    |
| TG (16:1/16:1/20:4) | 0.5831 | ± | 0.102 | 0.5774  | ± | 0.081 | 0.201    |
| TG (16:1/16:1/16:1) | 1.9518 | ± | 0.507 | 2.4398  | ± | 0.283 | 0.609    |
| TG (17:0/18:1/18:2) | 0.0364 | ± | 0.044 | 0.0955  | ± | 0.021 | 0.701    |
| TG (17:1/18:1/18:2) | 0.2894 | ± | 0.094 | 0.3623  | ± | 0.042 | 0.898    |
| TG (17:1/18:1/18:1) | 0.3099 | ± | 0.104 | 0.3808  | ± | 0.043 | 0.701    |
| TG (17:1/18:2/18:2) | 0.1250 | ± | 0.038 | 0.1698  | ± | 0.019 | 0.898    |
| TG (18:0/18:1/18:2) | 0.0446 | ± | 0.011 | 0.0448  | ± | 0.007 | 1.000    |
| TG (18:0/18:1/18:1) | 0.7749 | ± | 0.309 | 0.9041  | ± | 0.114 | 0.898    |
| TG (18:1/18:2/18:3) | 0.8532 | ± | 0.199 | 1.1533  | ± | 0.125 | 0.250    |
| TG (18:1/18:2/19:1) | 0.0889 | ± | 0.034 | 0.0958  | ± | 0.012 | 0.898    |
| TG (18:1/18:2/20:1) | 0.2874 | ± | 0.137 | 0.3563  | ± | 0.052 | 0.798    |
| TG (18:1/18:2/20:2) | 0.1743 | ± | 0.066 | 0.2608  | ± | 0.035 | 0.443    |
| TG (18:1/18:2/20:3) | 0.1834 | ± | 0.074 | 0.2137  | ± | 0.036 | 0.798    |
| TG (18:1/18:2/22:4) | 0.0979 | ± | 0.037 | 0.1202  | ± | 0.021 | 0.701    |
| TG (18:1/18:2/20:4) | 0.4301 | ± | 0.127 | 0.5883  | ± | 0.076 | 0.701    |
